# Supplementary material
Source: publisher figshare collection journal article supplement (https://sage.figshare.com/ndownloader/files/20417715)
Supplement: Supplementary file 1 [file 20417715]

**Implications of a Decentralized Postpartum Unit Design and Clinical Operations**

**Authors:** Freihoefer, K., Lindval, S., Bayramzadeh, S., Hanson, L.

**Course ID #** HERD77

| Full Name | AIA # / EDAC # | Email | Phone # |
|-----------|----------------|-------|---------|
|           |                |       |         |

**Learning Objective 1:** Learn a mixed-method approach to evaluate design characteristics post-occupancy and learn how to triangulate findings through the use of various methods.

**Learning Objective 2:** Understand staff satisfaction with medication and supplies distribution, nurses' stations, noise levels and interactive television systems.

**Learning Objectives 3:** Examine how the designed environment influences nurses' work processes.

**Learning Objective 4:** Investigate significant differences of noise levels throughout a unit and identify sources of peak noise.

**Question 1:** Why were the nurses' observed working the central nurses' station rather than the decentralized charting stations?

- a. Paper Charts
- b. Proximity to the Nursery
- c. Proximity to the Unit Entry
- d. All of the above

**Question 2:** The recommended decibel level for patient care areas by American society of Heating, Refrigerating, and Air-Conditioning Engineers is 45 to 55 dBA?

- a. True
- b. False

**Question 3:** Why was data 3 months premove and 6 months postmove excluded from the satisfaction analyses?

---

---

---

To earn AIA continuing education units please complete form, and email Jill Glaser at [jglaser@healthdesign.org](mailto:jglaser@healthdesign.org) and your credits will be uploaded to your AIA account. To earn EDAC continuing education units please complete the form, retain the form for your records and self-submit the credits at the time of your EDAC renewal. The form is your "proof of attendance."
